# Supplementary material for: Analysis of Genetic Diversity in Romanian Carpatina Goats Using SNP Genotyping Data
Source: MDPI journal article supplement (doi:10.3390/ani14040560), 2024-02-07
Supplement: s1 [file s1]

**Table S1.** Linkage disequilibrium  $r^2$  and SNPs number per chromosome in the studied four groups.

| CHR            | HA            |             | HT            |             | LA           |             | LT            |             |
|----------------|---------------|-------------|---------------|-------------|--------------|-------------|---------------|-------------|
|                | $r^2$         | SNPs number | $r^2$         | SNPs number | $r^2$        | SNPs number | $r^2$         | SNPs number |
| 1              | 0,0632        | 28494       | 0,0500        | 28530       | 0,0630       | 28530       | 0,0813        | 28404       |
| 2              | 0,0615        | 24534       | 0,0453        | 24517       | 0,0604       | 24481       | 0,0744        | 24499       |
| 3              | 0,0637        | 20368       | 0,0462        | 20421       | 0,0602       | 20367       | 0,0793        | 20295       |
| 4              | 0,0625        | 20961       | 0,0473        | 20997       | 0,0598       | 20943       | 0,0802        | 20942       |
| 5              | 0,0625        | 19566       | 0,0455        | 19584       | 0,0587       | 19494       | 0,0745        | 19440       |
| 6              | 0,0637        | 20601       | 0,0466        | 20583       | 0,0606       | 20493       | 0,0765        | 20510       |
| 7              | 0,0650        | 18914       | 0,0487        | 18963       | 0,0628       | 18968       | 0,0778        | 18896       |
| 8              | 0,0615        | 20412       | 0,0461        | 20412       | 0,0605       | 20395       | 0,0784        | 20357       |
| 9              | 0,0593        | 16587       | 0,0442        | 16534       | 0,0574       | 16552       | 0,0746        | 16551       |
| 10             | 0,0627        | 18288       | 0,0463        | 18306       | 0,0612       | 18306       | 0,0797        | 18234       |
| 11             | 0,0672        | 18638       | 0,0617        | 18675       | 0,0617       | 18675       | 0,0814        | 18578       |
| 12             | 0,0715        | 14976       | 0,0590        | 15013       | 0,0710       | 15011       | 0,0869        | 14937       |
| 13             | 0,0632        | 14221       | 0,0466        | 14292       | 0,0613       | 14132       | 0,0807        | 14186       |
| 14             | 0,0622        | 16526       | 0,0476        | 16596       | 0,0630       | 16596       | 0,0796        | 16451       |
| 15             | 0,0604        | 13986       | 0,0455        | 14022       | 0,0599       | 14004       | 0,0763        | 13949       |
| 16             | 0,0620        | 13788       | 0,0457        | 13841       | 0,0594       | 13806       | 0,0774        | 13751       |
| 17             | 0,0603        | 12744       | 0,0450        | 12762       | 0,0601       | 12717       | 0,0743        | 12743       |
| 18             | 0,0678        | 10934       | 0,0497        | 10971       | 0,0643       | 10935       | 0,0843        | 10898       |
| 19             | 0,0598        | 10605       | 0,0442        | 10656       | 0,0595       | 10620       | 0,0795        | 10549       |
| 20             | 0,0619        | 13005       | 0,0450        | 13023       | 0,0595       | 12987       | 0,0744        | 12969       |
| 21             | 0,0605        | 12375       | 0,0476        | 12375       | 0,0612       | 12303       | 0,0771        | 12286       |
| 22             | 0,0675        | 10215       | 0,0458        | 10215       | 0,0616       | 10179       | 0,0804        | 10163       |
| 23             | 0,0620        | 9018        | 0,0460        | 9018        | 0,0598       | 8982        | 0,0750        | 8965        |
| 24             | 0,0636        | 11511       | 0,0483        | 11529       | 0,0619       | 11529       | 0,0781        | 11457       |
| 25             | 0,0596        | 7389        | 0,0431        | 7407        | 0,0587       | 7407        | 0,0776        | 7336        |
| 26             | 0,0616        | 9063        | 0,0476        | 9063        | 0,0619       | 9063        | 0,0798        | 9027        |
| 27             | 0,0629        | 8035        | 0,0448        | 8073        | 0,0607       | 8073        | 0,0797        | 8073        |
| 28             | 0,0595        | 8010        | 0,0411        | 8028        | 0,0568       | 8010        | 0,0766        | 7938        |
| 29             | 0,0594        | 8307        | 0,0414        | 8343        | 0,0559       | 8289        | 0,0736        | 8253        |
| <b>Average</b> | <b>0.0627</b> |             | <b>0.0469</b> |             | <b>0.607</b> |             | <b>0.0782</b> |             |

**Table S2.** The declining trend of  $N_e$  for the four Carpatina studied groups across the past 1000 generations.

|        | high alt | high temp | low alt | low temp |
|--------|----------|-----------|---------|----------|
| GenAgo | Ne       | Ne        | Ne      | Ne       |
| 983    | 4537     | 5340      | 4907    | 3887     |
| 959    | 4841     | 5879      | 5080    | 4226     |
| 914    | 4726     | 5764      | 4956    | 4068     |
| 844    | 4570     | 5947      | 4789    | 3841     |
| 758    | 4503     | 5522      | 4497    | 3654     |
| 658    | 3979     | 5236      | 4123    | 3310     |
| 553    | 3648     | 4857      | 3754    | 2981     |
| 453    | 3177     | 4336      | 3306    | 2517     |
| 366    | 2747     | 3793      | 2804    | 2168     |
| 293    | 2328     | 3221      | 2381    | 1779     |
| 234    | 1893     | 2752      | 1982    | 1468     |
| 187    | 1555     | 2253      | 1619    | 1197     |
| 150    | 1274     | 1863      | 1314    | 972      |
| 120    | 1048     | 1551      | 1090    | 795      |
| 98     | 850      | 1271      | 888     | 647      |
| 80     | 709      | 1051      | 737     | 527      |
| 65     | 588      | 868       | 607     | 443      |
| 54     | 487      | 727       | 502     | 365      |
| 45     | 411      | 615       | 425     | 307      |
| 38     | 345      | 509       | 356     | 260      |
| 32     | 292      | 438       | 303     | 220      |
| 27     | 250      | 375       | 258     | 188      |
| 23     | 215      | 321       | 221     | 162      |
| 20     | 186      | 279       | 191     | 139      |
| 17     | 161      | 241       | 165     | 121      |
| 15     | 141      | 211       | 143     | 105      |
| 13     | 123      | 185       | 125     | 92       |
